# Supplementary material for: Proteasome Inhibitor-Associated PRES in Multiple Myeloma: Pharmacovigilance Evidence of Risk Signals and Concomitant Drug Interactions
Source: Research Square preprint supplement (doi:10.21203/rs.3.rs-7709378/v1), 2025-11-28
Supplement: Supplementary file 1 [file 0b417e4934718fb824099220.docx]

**Table S1.** PIs-Associated PRES Risk Signals Stratified by Plasma Cell Myeloma Indication

| **Drug** | **D_E** | **D_nE** | **nD_E** | **nD_nE** | **IC (95% CI)** | **Group** | |
| --- | --- | --- | --- | --- | --- | --- | --- |
| PIs | 315 | 97853 | 8866 | 18799775 | 2.71 (2.52–2.84) | | Raw |
| bortezomib | 231 | 58130 | 8950 | 18839498 | 3.00 (2.78–3.16) | Raw | |
| carfilzomib | 84 | 21166 | 9097 | 18876462 | 2.96 (2.60–3.22) | Raw | |
| ixazomib | 11 | 21672 | 9170 | 18875956 | 0.06 (-0.97–0.75) | Raw | |
| clopidogrel | 0 | 64043 | 9181 | 18833585 | -5.99 (-16.31–-4.01) | Raw | |
| tacrolimus | 1275 | 108547 | 7906 | 18789081 | 4.56 (4.47–4.63) | Raw | |
| PIs | 75 | 21510 | 8782 | 18391822 | 2.79 (2.41–3.07) | PCNs- | |
| bortezomib | 57 | 14150 | 8800 | 18399182 | 2.97 (2.53–3.28) | PCNs- | |
| carfilzomib | 15 | 4447 | 8842 | 18408885 | 2.55 (1.67–3.15) | PCNs- | |
| ixazomib | 3 | 3099 | 8854 | 18410233 | 0.81 (-1.26–2.02) | PCNs- | |
| clopidogrel | 0 | 63951 | 8857 | 18349381 | -5.97 (-16.29–-3.99) | PCNs- | |
| tacrolimus | 1266 | 108408 | 7591 | 18304924 | 4.57 (4.47–4.63) | PCNs- | |
| PIs | 240 | 76343 | 84 | 407953 | 2.21 (2–2.37) | PCNs+ | |
| bortezomib | 174 | 43980 | 150 | 440316 | 2.53 (2.28–2.72) | PCNs+ | |
| carfilzomib | 69 | 16719 | 255 | 467577 | 2.56 (2.16–2.85) | PCNs+ | |
| ixazomib | 8 | 18573 | 316 | 465723 | -0.61 (-1.82–0.19) | PCNs+ | |
| clopidogrel | 0 | 92 | 324 | 484204 | -0.17 (-10.5–1.81) | PCNs+ | |
| tacrolimus | 9 | 139 | 315 | 484157 | 3.98 (2.84–4.74) | PCNs+ | |

Denote: **Raw**, the analysis cohort without extended restrictions beyond limiting to primary or secondary suspect drugs; **PCNs+**, analysis restricted to reports with an indication of plasma cell myeloma; **PCNs−**, analysis restricted to reports without an indication of plasma cell myeloma.

**Table S2.** PIs-associated PRES risk signals stratified by hypertension indication

| **Drug** | **D_E** | **D_nE** | **nD_E** | **nD_nE** | **IC (95% CI)** | **Group** |
| --- | --- | --- | --- | --- | --- | --- |
| PIs | 315 | 97853 | 8866 | 18799775 | 2.71 (2.52–2.84) | Raw |
| bortezomib | 231 | 58130 | 8950 | 18839498 | 3.00 (2.78–3.16) | Raw |
| carfilzomib | 84 | 21166 | 9097 | 18876462 | 2.96 (2.6–3.22) | Raw |
| ixazomib | 11 | 21672 | 9170 | 18875956 | 0.06 (-0.97–0.75) | Raw |
| clopidogrel | 0 | 64043 | 9181 | 18833585 | -5.99 (-16.31–-4.01) | Raw |
| tacrolimus | 1275 | 108547 | 7906 | 18789081 | 4.56 (4.47–4.63) | Raw |
| PIs | 12 | 2556 | 439 | 493290 | 2.14 (1.16–2.8) | HTN-I+ |
| bortezomib | 8 | 1378 | 443 | 494468 | 2.27 (1.05–3.07) | HTN-I+ |
| carfilzomib | 4 | 764 | 447 | 495082 | 1.90 (0.14–2.98) | HTN-I+ |
| ixazomib | 0 | 450 | 451 | 495396 | -0.87 (-11.19–1.11) | HTN-I+ |
| clopidogrel | 0 | 4731 | 451 | 491115 | -3.27 (-13.59–-1.29) | HTN-I+ |
| tacrolimus | 64 | 2933 | 387 | 492913 | 4.32 (3.9–4.62) | HTN-I+ |
| PIs | 303 | 95297 | 8427 | 18306485 | 2.72 (2.53–2.86) | HTN-I- |
| bortezomib | 223 | 56752 | 8507 | 18345030 | 3.02 (2.8–3.18) | HTN-I- |
| carfilzomib | 80 | 20402 | 8650 | 18381380 | 2.97 (2.6–3.24) | HTN-I- |
| ixazomib | 11 | 21222 | 8719 | 18380560 | 0.12 (-0.91–0.81) | HTN-I- |
| clopidogrel | 0 | 59312 | 8730 | 18342470 | -5.84 (-16.17–-3.86) | HTN-I- |
| tacrolimus | 1211 | 105614 | 7519 | 18296168 | 4.56 (4.47–4.63) | HTN-I- |

Denote: **Raw**, the analysis cohort without extended restrictions beyond limiting to primary or secondary suspect drugs; **HTN-I+**, analysis for reports where HTN was the indication; **HTN-I−**, analysis for reports excluding HTN as an indication.

**Table S3.** Stratified Analysis of PRES Risk Signals Associated With PIs by Hypertension Adverse Event

| **Drug** | **D_E** | **D_nE** | **nD_E** | **nD_nE** | **IC (95% CI)** | **Group** |
| --- | --- | --- | --- | --- | --- | --- |
| PIs | 315 | 97853 | 8866 | 18799775 | 2.71 (2.52–2.84) | Raw |
| bortezomib | 231 | 58130 | 8950 | 18839498 | 3.00 (2.78–3.16) | Raw |
| carfilzomib | 84 | 21166 | 9097 | 18876462 | 2.96 (2.6–3.22) | Raw |
| ixazomib | 11 | 21672 | 9170 | 18875956 | 0.06 (-0.97–0.75) | Raw |
| clopidogrel | 0 | 64043 | 9181 | 18833585 | -5.99 (-16.31–-4.01) | Raw |
| tacrolimus | 1275 | 108547 | 7906 | 18789081 | 4.56 (4.47–4.63) | Raw |
| PIs | 285 | 96955 | 7543 | 18609409 | 2.79 (2.59–2.93) | HTN-R- |
| bortezomib | 217 | 57743 | 7611 | 18648621 | 3.13 (2.91–3.29) | HTN-R- |
| carfilzomib | 68 | 20654 | 7760 | 18685710 | 2.90 (2.49–3.19) | HTN-R- |
| ixazomib | 11 | 21609 | 7817 | 18684755 | 0.26 (-0.76–0.96) | HTN-R- |
| clopidogrel | 0 | 63323 | 7828 | 18643041 | -5.76 (-16.08–-3.78) | HTN-R- |
| tacrolimus | 1142 | 106908 | 6686 | 18599456 | 4.64 (4.54–4.71) | HTN-R- |
| PIs | 30 | 898 | 1323 | 190366 | 2.11 (1.51–2.55) | HTN-R+ |
| bortezomib | 14 | 387 | 1339 | 190877 | 2.12 (1.22–2.74) | HTN-R+ |
| carfilzomib | 16 | 512 | 1337 | 190752 | 1.97 (1.12–2.55) | HTN-R+ |
| ixazomib | 0 | 63 | 1353 | 191201 | -0.92 (-11.24–1.06) | HTN-R+ |
| clopidogrel | 0 | 720 | 1353 | 190544 | -3.48 (-13.8–-1.5) | HTN-R+ |
| tacrolimus | 133 | 1639 | 1220 | 189625 | 3.36 (3.07–3.57) | HTN-R+ |

Denote: **Raw**, the analysis cohort without extended restrictions beyond limiting to primary or secondary suspect drugs; **HTN-R−**, analysis excluding reports of HTN as an adverse event; **HTN-R+**, analysis for reports of HTN as an adverse event.

**Table S4.** Stratified Analysis of PRES Risk Signals Associated With PIs by Concomitant ACEI Use

| **Drug** | **D_E** | **D_nE** | **nD_E** | **nD_nE** | **IC (95% CI)** | **Group** |
| --- | --- | --- | --- | --- | --- | --- |
| PIs | 315 | 97853 | 8866 | 18799775 | 2.71 (2.52–2.84) | Raw |
| bortezomib | 231 | 58130 | 8950 | 18839498 | 3.00 (2.78–3.16) | Raw |
| carfilzomib | 84 | 21166 | 9097 | 18876462 | 2.96 (2.6–3.22) | Raw |
| ixazomib | 11 | 21672 | 9170 | 18875956 | 0.06 (-0.97–0.75) | Raw |
| clopidogrel | 0 | 64043 | 9181 | 18833585 | -5.99 (-16.31–-4.01) | Raw |
| tacrolimus | 1275 | 108547 | 7906 | 18789081 | 4.56 (4.47–4.63) | Raw |
| PIs | 300 | 94807 | 8511 | 18135350 | 2.69 (2.5–2.83) | ACEI- |
| bortezomib | 223 | 56343 | 8588 | 18173814 | 3.00 (2.78–3.16) | ACEI- |
| carfilzomib | 77 | 20528 | 8734 | 18209629 | 2.89 (2.51–3.16) | ACEI- |
| ixazomib | 11 | 20980 | 8800 | 18209177 | 0.11 (-0.92–0.8) | ACEI- |
| clopidogrel | 0 | 53264 | 8811 | 18176893 | -5.72 (-16.04–-3.74) | ACEI- |
| tacrolimus | 1243 | 105933 | 7568 | 18124224 | 4.57 (4.47–4.64) | ACEI- |
| PIs | 15 | 3046 | 355 | 664425 | 2.81 (1.94–3.42) | ACEI+ |
| bortezomib | 8 | 1787 | 362 | 665684 | 2.50 (1.29–3.31) | ACEI+ |
| carfilzomib | 7 | 638 | 363 | 666833 | 3.12 (1.82–3.98) | ACEI+ |
| ixazomib | 0 | 692 | 370 | 666779 | -0.83 (-11.15–1.15) | ACEI+ |
| clopidogrel | 0 | 10779 | 370 | 656692 | -3.70 (-14.02–-1.72) | ACEI+ |
| tacrolimus | 32 | 2614 | 338 | 664857 | 4.04 (3.45–4.46) | ACEI+ |

Denote: **Raw**, the analysis cohort without extended restrictions beyond limiting to primary or secondary suspect drugs; **ACEI−**, no concomitant use of angiotensin-converting enzyme inhibitors; **ACEI+**, concomitant use of angiotensin-converting enzyme inhibitors.

**Table S5.** Stratified Analysis of PRES Risk Signals Associated With PIs by Concomitant ARB Use

| **Drug** | **D_E** | **D_nE** | **nD_E** | **nD_nE** | **IC (95% CI)** | **Group** |
| --- | --- | --- | --- | --- | --- | --- |
| PIs | 315 | 97853 | 8866 | 18799775 | 2.71 (2.52–2.84) | Raw |
| bortezomib | 231 | 58130 | 8950 | 18839498 | 3.00 (2.78–3.16) | Raw |
| carfilzomib | 84 | 21166 | 9097 | 18876462 | 2.96 (2.6–3.22) | Raw |
| ixazomib | 11 | 21672 | 9170 | 18875956 | 0.06 (-0.97–0.75) | Raw |
| clopidogrel | 0 | 64043 | 9181 | 18833585 | -5.99 (-16.31–-4.01) | Raw |
| tacrolimus | 1275 | 108547 | 7906 | 18789081 | 4.56 (4.47–4.63) | Raw |
| PIs | 310 | 95323 | 8600 | 18090372 | 2.71 (2.52–2.84) | ARB- |
| bortezomib | 228 | 56785 | 8682 | 18128910 | 3.00 (2.78–3.16) | ARB- |
| carfilzomib | 82 | 20598 | 8828 | 18165097 | 2.95 (2.59–3.22) | ARB- |
| ixazomib | 11 | 20957 | 8899 | 18164738 | 0.09 (-0.93–0.78) | ARB- |
| clopidogrel | 0 | 56311 | 8910 | 18129384 | -5.82 (-16.14–-3.84) | ARB- |
| tacrolimus | 1265 | 105878 | 7645 | 18079817 | 4.57 (4.48–4.64) | ARB- |
| PIs | 5 | 2530 | 266 | 709403 | 1.90 (0.34–2.89) | ARB+ |
| bortezomib | 3 | 1345 | 268 | 710588 | 1.78 (-0.29–2.99) | ARB+ |
| carfilzomib | 2 | 568 | 269 | 711365 | 1.80 (-0.8–3.19) | ARB+ |
| ixazomib | 0 | 715 | 271 | 711218 | -0.63 (-10.96–1.35) | ARB+ |
| clopidogrel | 0 | 7732 | 271 | 704201 | -2.79 (-13.11–-0.81) | ARB+ |
| tacrolimus | 10 | 2669 | 261 | 709264 | 2.78 (1.71–3.51) | ARB+ |

Denote: **Raw**, the analysis cohort without extended restrictions beyond limiting to primary or secondary suspect drugs; **ARB−**, no concomitant use of angiotensin receptor blockers; **ARB+**, concomitant use of angiotensin receptor blockers.

**Table S6.** Stratified Analysis of PRES Risk Signals Associated With PIs by Concomitant CCB Use

| **Drug** | **D_E** | **D_nE** | **nD_E** | **nD_nE** | **IC (95% CI)** | **Group** |
| --- | --- | --- | --- | --- | --- | --- |
| PIs | 315 | 97853 | 8866 | 18799775 | 2.71 (2.52–2.84) | Raw |
| bortezomib | 231 | 58130 | 8950 | 18839498 | 3.00 (2.78–3.16) | Raw |
| carfilzomib | 84 | 21166 | 9097 | 18876462 | 2.96 (2.6–3.22) | Raw |
| ixazomib | 11 | 21672 | 9170 | 18875956 | 0.06 (-0.97–0.75) | Raw |
| clopidogrel | 0 | 64043 | 9181 | 18833585 | -5.99 (-16.31–-4.01) | Raw |
| tacrolimus | 1275 | 108547 | 7906 | 18789081 | 4.56 (4.47–4.63) | Raw |
| PIs | 296 | 94044 | 8340 | 18228695 | 2.72 (2.52–2.86) | CCB- |
| bortezomib | 220 | 56061 | 8416 | 18266678 | 3.02 (2.8–3.19) | CCB- |
| carfilzomib | 76 | 20354 | 8560 | 18302385 | 2.91 (2.53–3.19) | CCB- |
| ixazomib | 11 | 20667 | 8625 | 18302072 | 0.16 (-0.86–0.86) | CCB- |
| clopidogrel | 0 | 56767 | 8636 | 18265972 | -5.77 (-16.1–-3.79) | CCB- |
| tacrolimus | 1190 | 102863 | 7446 | 18219876 | 4.58 (4.49–4.65) | CCB- |
| PIs | 19 | 3809 | 526 | 571080 | 2.24 (1.47–2.77) | CCB+ |
| bortezomib | 11 | 2069 | 534 | 572820 | 2.21 (1.19–2.91) | CCB+ |
| carfilzomib | 8 | 812 | 537 | 574077 | 2.73 (1.52–3.53) | CCB+ |
| ixazomib | 0 | 1005 | 545 | 573884 | -1.54 (-11.87–0.44) | CCB+ |
| clopidogrel | 0 | 7276 | 545 | 567613 | -3.89 (-14.21–-1.91) | CCB+ |
| tacrolimus | 85 | 5684 | 460 | 569205 | 3.84 (3.48–4.1) | CCB+ |

Denote: **Raw**, the analysis cohort without extended restrictions beyond limiting to primary or secondary suspect drugs; **CCB−**, no concomitant use of calcium channel blockers; **CCB+**, concomitant use of calcium channel blockers.

**Table S7.** Stratified Analysis of PRES Risk Signals Associated With PIs by Concomitant Glucocorticoid Use

| **Drug** | **D_E** | **D_nE** | **nD_E** | **nD_nE** | **IC (95% CI)** | **Group** |
| --- | --- | --- | --- | --- | --- | --- |
| PIs | 315 | 97853 | 8866 | 18799775 | 2.71 (2.52–2.84) | Raw |
| bortezomib | 231 | 58130 | 8950 | 18839498 | 3.00 (2.78–3.16) | Raw |
| carfilzomib | 84 | 21166 | 9097 | 18876462 | 2.96 (2.60–3.22) | Raw |
| ixazomib | 11 | 21672 | 9170 | 18875956 | 0.06 (-0.97–0.75) | Raw |
| clopidogrel | 0 | 64043 | 9181 | 18833585 | -5.99 (-16.31–-4.01) | Raw |
| tacrolimus | 1275 | 108547 | 7906 | 18789081 | 4.56 (4.47–4.63) | Raw |
| PIs | 89 | 37015 | 5782 | 17579688 | 2.79 (2.44–3.05) | GCs− |
| bortezomib | 71 | 19440 | 5800 | 17597263 | 3.35 (2.95–3.63) | GCs− |
| carfilzomib | 15 | 8657 | 5856 | 17608046 | 2.19 (1.32–2.79) | GCs− |
| ixazomib | 6 | 9505 | 5865 | 17607198 | 0.82 (-0.59–1.73) | GCs− |
| clopidogrel | 0 | 60680 | 5871 | 17556023 | -5.38 (-15.7–-3.4) | GCs− |
| tacrolimus | 661 | 52000 | 5210 | 17564703 | 5.19 (5.06–5.28) | GCs− |
| PIs | 226 | 60838 | 3084 | 1220087 | 0.52 (0.30–0.67) | GCs+ |
| bortezomib | 160 | 38690 | 3150 | 1242235 | 0.67 (0.41–0.86) | GCs+ |
| carfilzomib | 69 | 12509 | 3241 | 1268416 | 1.07 (0.67–1.36) | GCs+ |
| ixazomib | 5 | 12167 | 3305 | 1268758 | -2.54 (-4.10–-1.56) | GCs+ |
| clopidogrel | 0 | 3363 | 3310 | 1277562 | -4.20 (-14.53–-2.22) | GCs+ |
| tacrolimus | 614 | 56547 | 2696 | 1224378 | 2.05 (1.92–2.15) | GCs+ |

Denote: **Raw**, the analysis cohort without extended restrictions beyond limiting to primary or secondary suspect drugs; **GCs−**, no concomitant use of glucocorticoids; **GCs+**, concomitant use of glucocorticoids.

**Table S8.** Stratified Analysis of PRES Risk Signals Associated With PIs by Concomitant Immunomodulatory Agent Use

| **Drug** | **D_E** | **D_nE** | **nD_E** | **nD_nE** | **IC (95% CI)** | **Group** |
| --- | --- | --- | --- | --- | --- | --- |
| PIs | 315 | 97853 | 8866 | 18799775 | 2.71 (2.52–2.84) | Raw |
| bortezomib | 231 | 58130 | 8950 | 18839498 | 3 (2.78–3.16) | Raw |
| carfilzomib | 84 | 21166 | 9097 | 18876462 | 2.96 (2.6–3.22) | Raw |
| ixazomib | 11 | 21672 | 9170 | 18875956 | 0.06 (-0.97–0.75) | Raw |
| clopidogrel | 0 | 64043 | 9181 | 18833585 | -5.99 (-16.31–-4.01) | Raw |
| tacrolimus | 1275 | 108547 | 7906 | 18789081 | 4.56 (4.47–4.63) | Raw |
| PIs | 180 | 56764 | 8790 | 18321601 | 2.67 (2.42–2.85) | IMiDs- |
| bortezomib | 131 | 35613 | 8839 | 18342752 | 2.87 (2.58–3.08) | IMiDs- |
| carfilzomib | 43 | 12127 | 8927 | 18366238 | 2.75 (2.24–3.11) | IMiDs- |
| clopidogrel | 0 | 63959 | 8970 | 18314406 | -5.99 (-16.32–-4.01) | IMiDs- |
| ixazomib | 9 | 9507 | 8961 | 18368858 | 0.88 (-0.26–1.64) | IMiDs- |
| tacrolimus | 1274 | 108251 | 7696 | 18270114 | 4.56 (4.47–4.62) | IMiDs- |
| PIs | 135 | 41089 | 76 | 478174 | 2.97 (2.68–3.17) | IMiDs+ |
| bortezomib | 100 | 22517 | 111 | 496746 | 3.37 (3.04–3.61) | IMiDs+ |
| carfilzomib | 41 | 9039 | 170 | 510224 | 3.3 (2.78–3.67) | IMiDs+ |
| ixazomib | 2 | 12165 | 209 | 507098 | -1.13 (-3.72–0.26) | IMiDs+ |
| clopidogrel | 0 | 84 | 211 | 519179 | -0.1 (-10.42–1.88) | IMiDs+ |
| tacrolimus | 1 | 296 | 210 | 518967 | 1.27 (-2.51–2.96) | IMiDs+ |

Denote: **Raw**, the analysis cohort without extended restrictions beyond limiting to primary or secondary suspect drugs; **IMiDs−**, no concomitant use of IMiDs; **IMiDs+**, concomitant use of IMiDs.

**Table S9.** Stratified Analysis of PRES Risk Signals Associated With PIs by Concomitant Glucocorticoid Use and Comorbid Hypertension

| **Drug** | **D_E** | **D_nE** | **nD_E** | **nD_nE** | **IC (95% CI)** | **Group** |
| --- | --- | --- | --- | --- | --- | --- |
| PIs | 315 | 97853 | 8866 | 18799775 | 2.71 (2.52–2.84) | Raw5 |
| bortezomib | 231 | 58130 | 8950 | 18839498 | 3 (2.78–3.16) | Raw5 |
| carfilzomib | 84 | 21166 | 9097 | 18876462 | 2.96 (2.6–3.22) | Raw5 |
| ixazomib | 11 | 21672 | 9170 | 18875956 | 0.06 (-0.97–0.75) | Raw5 |
| clopidogrel | 0 | 64043 | 9181 | 18833585 | -5.99 (-16.31–-4.01) | Raw5 |
| tacrolimus | 1275 | 108547 | 7906 | 18789081 | 4.56 (4.47–4.63) | Raw5 |
| PIs | 89 | 36716 | 5507 | 17143871 | 2.84 (2.49–3.09) | GCs−/HTN− |
| bortezomib | 71 | 19270 | 5525 | 17161317 | 3.39 (3–3.67) | GCs−/HTN− |
| carfilzomib | 15 | 8585 | 5581 | 17172002 | 2.23 (1.36–2.83) | GCs−/HTN− |
| ixazomib | 6 | 9446 | 5590 | 17171141 | 0.86 (-0.56–1.77) | GCs−/HTN− |
| clopidogrel | 0 | 56331 | 5596 | 17124256 | -5.24 (-15.56–-3.26) | GCs−/HTN− |
| tacrolimus | 633 | 51160 | 4963 | 17129427 | 5.18 (5.05–5.28) | GCs−/HTN− |
| PIs | 214 | 58581 | 2920 | 1162614 | 0.5 (0.28–0.67) | GCs+/HTN− |
| bortezomib | 152 | 37482 | 2982 | 1183713 | 0.65 (0.38–0.84) | GCs+/HTN− |
| carfilzomib | 65 | 11817 | 3069 | 1209378 | 1.08 (0.67–1.37) | GCs+/HTN− |
| clopidogrel | 0 | 2981 | 3134 | 1218214 | -4.03 (-14.35–-2.05) | GCs+/HTN− |
| ixazomib | 5 | 11776 | 3129 | 1209419 | -2.48 (-4.05–-1.5) | GCs+/HTN− |
| tacrolimus | 578 | 54454 | 2556 | 1166741 | 2.03 (1.89–2.13) | GCs+/HTN− |

Denote: **Raw**, the analysis cohort without extended restrictions beyond limiting to primary or secondary suspect drugs; **GCs−/HTN−**, no concomitant use of GCs and no comorbid HTN; **GCs+/HTN−**, concomitant use of GCs and no comorbid HTN.

**Table S10.** Stratified Analysis of PRES Risk Signals Associated With PIs by Concomitant Use of Immunomodulatory Agents and Glucocorticoids

| **Drug** | **D_E** | **D_nE** | **nD_E** | **nD_nE** | **IC (95% CI)** | **Group** |
| --- | --- | --- | --- | --- | --- | --- |
| PIs | 315 | 97853 | 8866 | 18799775 | 2.71 (2.52-2.84) | Raw |
| bortezomib | 231 | 58130 | 8950 | 18839498 | 3 (2.78-3.16) | Raw |
| carfilzomib | 84 | 21166 | 9097 | 18876462 | 2.96 (2.6-3.22) | Raw |
| ixazomib | 11 | 21672 | 9170 | 18875956 | 0.06 (-0.97-0.75) | Raw |
| clopidogrel | 0 | 64043 | 9181 | 18833585 | -5.99 (-16.31--4.01) | Raw |
| tacrolimus | 1275 | 108547 | 7906 | 18789081 | 4.56 (4.47-4.63) | Raw |
| PIs | 63 | 30182 | 5757 | 17223279 | 2.56 (2.15-2.86) | IMiDs-/GCs− |
| bortezomib | 47 | 15755 | 5773 | 17237706 | 3.02 (2.54-3.37) | IMiDs-/GCs− |
| carfilzomib | 13 | 7528 | 5807 | 17245933 | 2.14 (1.21-2.79) | IMiDs-/GCs− |
| ixazomib | 6 | 7055 | 5814 | 17246406 | 1.17 (-0.25-2.08) | IMiDs-/GCs− |
| clopidogrel | 0 | 60634 | 5820 | 17192827 | -5.39 (-15.72--3.41) | IMiDs-/GCs− |
| tacrolimus | 661 | 51907 | 5159 | 17201554 | 5.18 (5.05-5.27) | IMiDs-/GCs− |
| PIs | 109 | 34256 | 51 | 121765 | 1.61 (1.29-1.84) | IMiDs+/GCs+ |
| bortezomib | 76 | 18832 | 84 | 137189 | 1.94 (1.56-2.21) | IMiDs+/GCs+ |
| carfilzomib | 39 | 7910 | 121 | 148111 | 2.19 (1.65-2.57) | IMiDs+/GCs+ |
| clopidogrel | 0 | 38 | 160 | 155983 | -0.11 (-10.44-1.87) | IMiDs+/GCs+ |
| ixazomib | 2 | 9715 | 158 | 146306 | -2.07 (-4.66--0.68) | IMiDs+/GCs+ |
| tacrolimus | 1 | 203 | 159 | 155818 | 1.08 (-2.71-2.76) | IMiDs+/GCs+ |

Denote: **Raw**, the analysis cohort without extended restrictions beyond limiting to primary or secondary suspect drugs; **IMiDs−/GCs−**, no concomitant use of either IMiDs or GCs; **IMiDs+/GCs+**, concomitant use of both IMiDs and GCs.
